# Supplementary material
Source: PubMed Central journal article supplement (PMC5832924)
Supplement: 10.1194_M078279_jlr.M078279-1.pdf [file 10.1194_M078279_jlr.M078279-1.pdf]

## Supplemental Figure 1

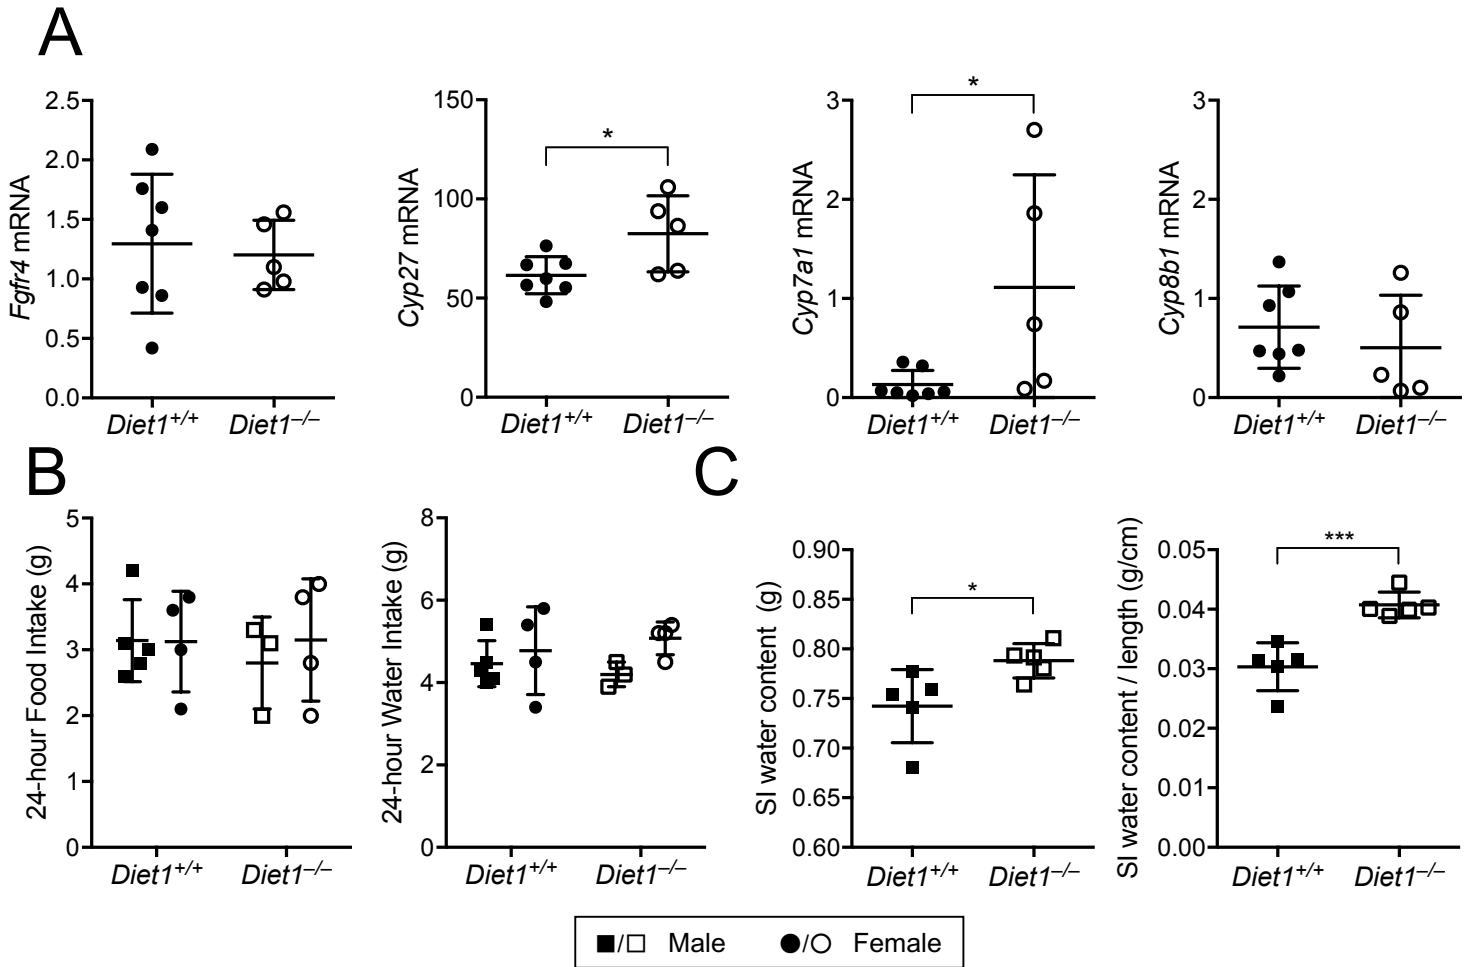

### *Diet1*<sup>-/-</sup> congenic mouse characterization (continued)

- (A) Hepatic expression of *Cyp27* and *Cyp7a1* is elevated in *Diet1*<sup>-/-</sup> mice, while *Cyp8b1* and *Fgfr4* expression is similar to *Diet1*<sup>+/+</sup> mice. Data from female mice fed on atherogenic diet for 3 weeks. N = 5–7 mice/genotype.
- (B) Normal food and water intake in *Diet1*<sup>-/-</sup> mice compared to *Diet1*<sup>+/+</sup> mice assessed during single housing in metabolic cages.
- (C) Following a 16-hour fast, small intestine (SI) was excised and contents extruded. *Diet1*<sup>-/-</sup> mice exhibit increased water content when expressed as absolute amount and when normalized to SI length after 6 weeks on atherogenic diet. N = 4–5 mice per group. Statistical analyses via student's *t*-test. \*, *p* < 0.05; \*\*, *p* < 0.01; \*\*\*, *p* < 0.001.

## Supplemental Figure 2

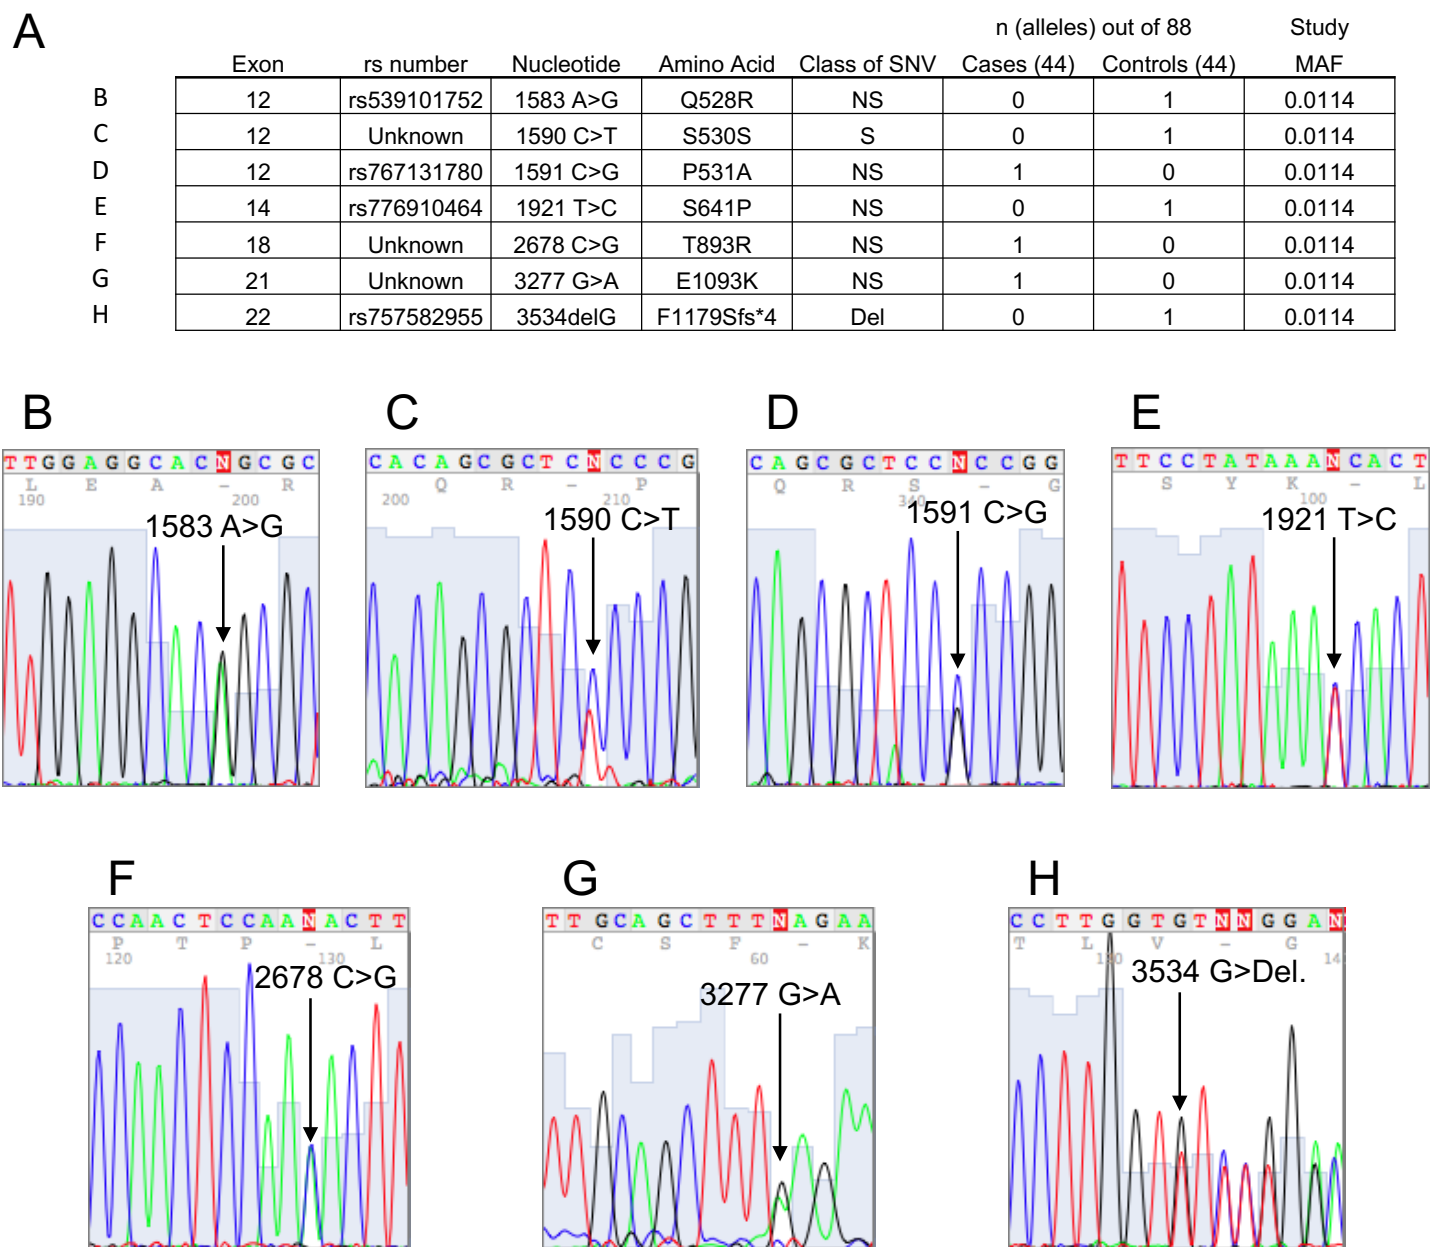

### Rare and Novel single nucleotide variants in the coding region of *DIET1*

(A) Each rare or novel single nucleotide variant is listed individually, and sorted by nucleotide position, with the major allele on the left and minor allele on the right. Affected amino acid is listed, as well as the number of minor alleles that appear within the case or control groups. Minor allele frequency (MAF) within the study sample is also listed.

(B-H) Sequence traces for each novel variant listed from (A). Affected nucleotide marked with arrow. Chromatograms imaged with 4peaks (<http://nucleobytes.com/index.php/4peaks>).

### Supplemental Figure 3

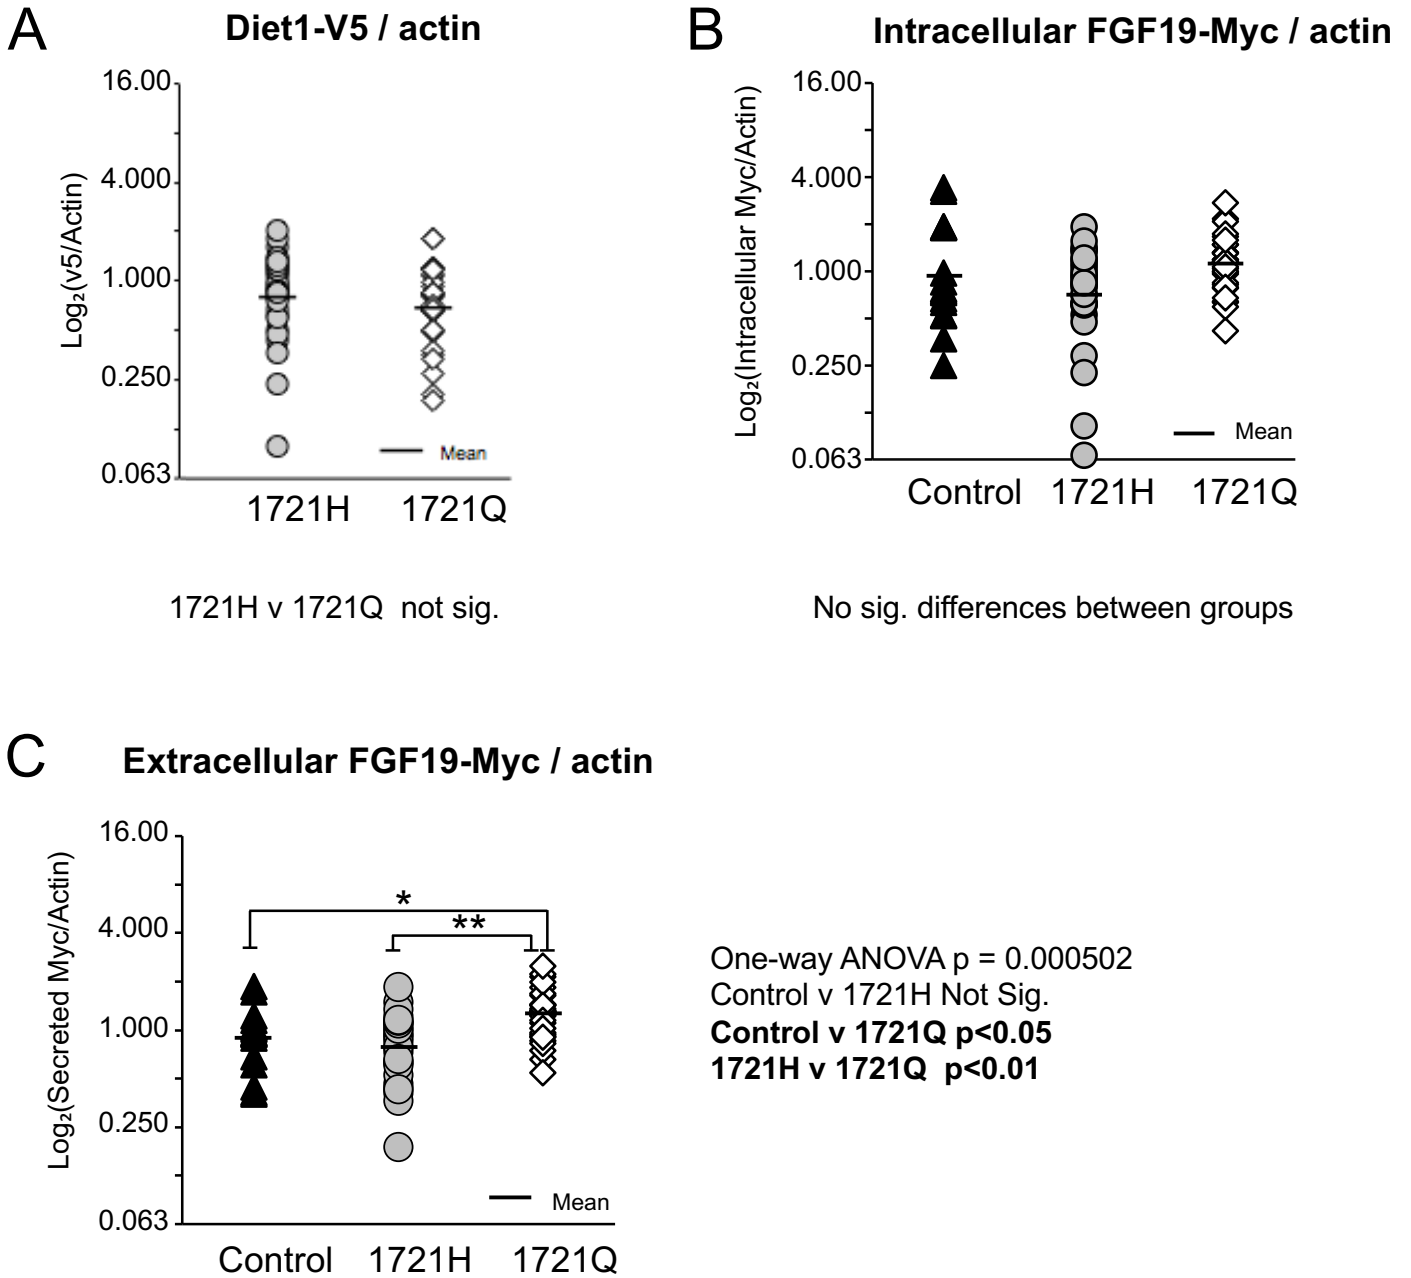

**DIET1-1721Q promotes increased extracellular FGF19 compared to DIET1-1721H without influencing intracellular FGF19 levels**

Shown are protein levels from Fig. 7 normalized to actin. Statistical analyses performed by one-way ANOVA. \*,  $p < 0.05$ ; \*\*,  $p < 0.01$ .

### Supplemental Table I: Sequencing primer sets

Oligonucleotides used in this study to PCR amplify and sequence *DIET1* exons and exon/intron borders.

| Exon     | Oligonucleotide         | strand | Genomic start coordinate | Used for |
|----------|-------------------------|--------|--------------------------|----------|
| 1-F      | gctagataaagaaccagcgta   | +      | 19337636                 | PCR, seq |
| 1-R      | ttcaggctgtacggggaat     | -      | 19338096                 | PCR, seq |
| 2-F      | Gacttatgtcatttggta      | +      | 19355546                 | PCR      |
| 2-R      | gaaagggaggtgggaaag      | -      | 19355861                 | PCR, seq |
| 3 & 4-F1 | tcacttggcgccttaaattca   | +      | 19376417                 | PCR      |
| 3 & 4-R1 | gtcctgggaaatccctcagt    | -      | 19377219                 | PCR      |
| 3&4-F2   | Gtaccctgtctctttctg      | +      | 19376744                 | seq      |
| 3&4-R2   | acctgaaatctctgtgaactc   | -      | 19377096                 | seq      |
| 5-F      | Tgcttctattgcaggctct     | +      | 19392812                 | PCR, seq |
| 5-R      | ttgactgaaatcttaaacaca   | -      | 19393037                 | PCR, seq |
| 6-F      | cttgagtcttccagttgcac    | +      | 19412363                 | PCR, seq |
| 6-R      | cacagcctccaaaaacac      | -      | 19412643                 | PCR, seq |
| 7-F      | gtaagcagccactctagca     | +      | 19413396                 | PCR, seq |
| 7-R      | ccaaggcctctatgtaatg     | -      | 19413669                 | PCR, seq |
| 8-F      | gtcagacagaagaagctaag    | +      | 19417091                 | PCR, seq |
| 8-R      | tcgaaacacaagttccaaga    | -      | 19417371                 | PCR, seq |
| 9-F      | gtaaatgtgaagattagaatcgg | +      | 19422728                 | PCR, seq |
| 9-R      | ctttagcagtgcatggtaatt   | -      | 19422939                 | PCR, seq |
| 10-F     | gccttggtgctttaaact      | +      | 19425385                 | PCR, seq |

|          |                         |   |          |          |
|----------|-------------------------|---|----------|----------|
| 10-R     | gacttacctttgccttgatag   | - | 19425787 | PCR, seq |
| 11-F     | gcaggcctcctaagatgatt    | + | 19435034 | PCR, seq |
| 11-R     | tcattccacaacatgcaagaa   | - | 19435311 | PCR, seq |
| 12-F     | gattgtggagcaaagaacagc   | + | 19443932 | PCR, seq |
| 12-R     | caagctcagcgatttacaacc   | - | 19444139 | PCR, seq |
| 13-F     | ccagagacaggtcaatggaa    | + | 19454514 | PCR, seq |
| 13-R     | cctgaaaaggatgagctatg    | - | 19454819 | PCR, seq |
| 14-F     | gattggagaatgggacagatg   | + | 19464026 | PCR, seq |
| 14-R     | cacacctgtattaggtattcg   | - | 19464342 | PCR, seq |
| 14 F2    | Gtgatgtgttttaacagt      | + | 19464097 | seq      |
| 15&16-F1 | gctctgccttttcaaagtgtg   | + | 19492589 | PCR      |
| 15&16-R1 | ctgcaaacacttcaccacca    | - | 19493387 | PCR      |
| 15&16-F2 | gagcagtttgagagccaac     | + | 19492611 | seq      |
| 15&16-R2 | cagaaccgtactagctttcc    | - | 19492876 | seq      |
| 15&16-F3 | cagtgtagggttaagagacag   | + | 19493154 | seq      |
| 15&16-R3 | Accaccagggtgaactg       | - | 19493372 | seq      |
| 17-F     | gggaaagaaaagcgtcttatg   | + | 19493702 | PCR, seq |
| 17-R     | tatcggttgattggcaagac    | - | 19494264 | PCR, seq |
| 18-F     | gtggttgcattgtttttgtcc   | + | 19498138 | PCR, seq |
| 18-R     | ttgatcaaattccacttgctttt | - | 19498693 | PCR, seq |
| 19-F     | cctcttcatccattccataac   | + | 19546532 | PCR, seq |
| 19-R     | ttgattccttgcaagttttcc   | - | 19546749 | PCR, seq |
| 20-F     | gcagtagaaaaccagaaaacc   | + | 19568920 | PCR, seq |

|       |                         |   |          |          |
|-------|-------------------------|---|----------|----------|
| 20-R  | gatgctaggctgtgctactt    | - | 19569217 | PCR, seq |
| 21-F  | aagattgtacagatagaaactgc | + | 19571884 | PCR, seq |
| 21-R  | ggcagaaatttgggagatgct   | - | 19572158 | PCR, seq |
| 22-F  | Cgtgcccgccctcttattc     | + | 19612829 | PCR, seq |
| 22-R  | gcactgtgaacttttagagagaa | - | 19613066 | PCR, seq |
| 23-F  | ctaggggcacaatgctgtag    | + | 19616313 | PCR, seq |
| 23-R  | ggggcaagaagactgtgagt    | - | 19616675 | PCR, seq |
| 23-F2 | cactggaagaattctacatg    | + | 19616415 | PCR, seq |
| 23-R2 | gcaagaagactgtgagtagag   | - | 19616671 | PCR, seq |
| 24-F1 | gcccaggtttgaactcttg     | + | 19620241 | PCR, seq |
| 24-R1 | Ccttaccttcccctggtgtt    | - | 19620612 | PCR, seq |
| 24-F2 | Gttaaactgtaactggctt     | + | 19620269 | seq      |
| 25-F  | gcagtttgaattgcatgttita  | + | 19636626 | PCR, seq |
| 25-R  | cccccttcacatatccaaagt   | - | 19637070 | PCR, seq |
| 26-F1 | aagtgcagacagagcaagag    | + | 19640787 | PCR, seq |
| 26-R1 | tcaccttcacatgcaaaaat    | - | 19641256 | PCR, seq |
| 26-F2 | Agaagagggcaatgtgatag    | + | 19640847 | PCR, seq |
| 26-R2 | Ccttcacatgcaaaaatacc    | - | 19641253 | PCR, seq |
| 27-F  | gcttttgacctcactgaatg    | + | 19676390 | PCR, seq |
| 27-R  | Gctccccagttgctatcag     | - | 19676764 | PCR, seq |
| 28-F1 | ttggcagctcagatcatacg    | + | 19678268 | PCR, seq |
| 28-R1 | agccaagtcaactccctcag    | - | 19678914 | PCR, seq |
| 28-F2 | aatcccatcattgtatttcg    | + | 19678330 | PCR, seq |

|         |                         |   |          |          |
|---------|-------------------------|---|----------|----------|
| 28-R2   | Tgcagcctgagtgacaga      | - | 19678581 | seq      |
| 29-F    | gcatcatctcttttggttg     | + | 19739180 | PCR, seq |
| 29-R    | aatggctagattaaaaatgtgc  | - | 19739451 | PCR, seq |
| 30-F    | acaggaatcttcaagtctaatg  | + | 19780379 | PCR, seq |
| 30-R    | tgaaggaaaatatctgctgaac  | - | 19780606 | PCR, seq |
| 31-F    | gtagtagcaaatgtgatagaca  | + | 19787356 | PCR, seq |
| 31-R    | ttcacacaaattgttaaagcaga | - | 19787624 | PCR, seq |
| 32-F    | cacattccgactcatgcgata   | + | 19820061 | PCR, seq |
| 32-R    | ctgccccagaaagaaatgag    | - | 19820402 | PCR, seq |
| 33-F    | gagctgttacatagccagag    | + | 19856327 | PCR, seq |
| 33-R    | ggcgaagttcataggcagag    | - | 19856785 | PCR, seq |
| 34-F1   | ggagggaaactccctaatgc    | + | 19884073 | PCR, seq |
| 34-R1   | tcattttatctgtcgagcttc   | - | 19884446 | PCR, seq |
| 34-F2   | aatgtccaacactggatgg     | + | 19884055 | PCR, seq |
| 34-R2   | ggacagatgccttgtttgc     | - | 19884527 | PCR, seq |
| 35-F1   | tgtgagaattcattgggacaaa  | + | 19896637 | PCR, seq |
| 35-R1   | gcaggttaagttgctggttc    | - | 19896866 | PCR, seq |
| 35 F2   | Ttttttttgcagccaac       | + | 19896692 | seq      |
| 36-F    | atcttcttctcctcctaatac   | + | 19904723 | PCR, seq |
| 36-R    | accacaaactgattgatgctc   | - | 19904931 | PCR, seq |
| 37&38-F | ccatgccagttgtgttcaaa    | + | 19981140 | PCR, seq |
| 37&38-R | ctgcccagaaaataaatcca    | - | 19981611 | PCR, seq |
| 39-F1   | aatgtggtgccttgggtgc     | + | 20019442 | PCR, seq |

|       |                        |   |          |          |
|-------|------------------------|---|----------|----------|
| 39-R1 | tcaagcaacactgggtcagc   | - | 20019781 | PCR, seq |
| 39-F2 | Attttgatggccctgtgtg    | + | 20019608 | PCR, seq |
| 39-R2 | Ctggtcagcctgtgtgtg     | - | 20019771 | PCR, seq |
| 40-F1 | caagcagtggtggctgtag    | + | 20022921 | PCR, seq |
| 40-R1 | atacggcaaagaaagagcattt | - | 20023488 | PCR, seq |
| 40-F2 | Caacatcaggaagcctggaga  | + | 20023123 | PCR, seq |
| 40-F3 | Gaagtctccacaatctgatag  | + | 20023215 | PCR, seq |
| 40-R2 | Tctccaggcttcctgatgtt   | - | 20023124 | PCR, seq |
| 40-R3 | actggcatttacaatcctttct | - | 20023263 | PCR, seq |
| 40-R4 | tgaagataaggtactgattctg | - | 20023345 | PCR, seq |



**Supplemental Table II. Nucleotide variants identified by sequencing *DIET1* coding region.**

Unique nucleotide variants identified in the 44 individuals of the case-control study. The novel variants represent a subset of the total variants.

|               | All Single Nucleotide Variants |          |      | Novel Variants |          |
|---------------|--------------------------------|----------|------|----------------|----------|
|               | Cases                          | Controls | Both | Cases          | Controls |
| Synonymous    | 1                              | 1        | 7    | 0              | 1        |
| Nonsynonymous | 3                              | 6        | 16   | 3              | 2        |

**Supplemental Table III. Catalog of *DIET1* coding region variants and their frequencies.**

Variants are sorted by nucleotide position, with major and minor alleles and corresponding amino acid identities indicated. The minor allele frequency within the study sample and within the 1000 Genomes project are shown (**1**). The final column lists the *p*-value of association between a particular variant and case-control status, as calculated by Fisher's Exact Test. The corrected  $\alpha$ -level for multiple testing is  $p < 0.00143$ . Shading highlights *rs12256835*, which meets the significance threshold. S, synonymous; NS, nonsynonymous.

| Exon | rs number  | Nucleotide | Amino Acid | Class of SNV | n (alleles) out of 88 |               | Study MAF | 1000 Genomes MAF | Fisher's Test <i>p</i> value |
|------|------------|------------|------------|--------------|-----------------------|---------------|-----------|------------------|------------------------------|
|      |            |            |            |              | Cases (44)            | Controls (44) |           |                  |                              |
| 5    | rs57243552 | 615 A>G    | Q205Q      | S            | 4                     | 2             | 0.0682    | 0.1227           | 0.6763                       |
| 8    | rs11008573 | 975 T>C    | G325G      | S            | 10                    | 7             | 0.1932    | 0.1259           | 0.5902                       |
| 8    | rs78076387 | 1002 G>A   | R334R      | S            | 3                     | 0             | 0.0341    | 0.0714           | 0.2414                       |
| 10   | rs12779623 | 1232 A>G   | Q411R      | NS           | 9                     | 7             | 0.1818    | 0.1516           | 0.7830                       |
| 10   | rs10826986 | 1405 A>G   | T469A      | NS           | 2                     | 4             | 0.0682    | 0.0810           | 0.6763                       |
| 12   | Unknown    | 1583 A>G   | Q528R      | NS           | 0                     | 1             | 0.0114    | 0                | 1                            |
| 12   | Unknown    | 1590 C>T   | S530S      | S            | 0                     | 1             | 0.0114    | 0                | 1                            |
| 12   | Unknown    | 1591 C>G   | P531A      | NS           | 1                     | 0             | 0.0114    | 0                | 1                            |
| 13   | rs78786296 | 1806 G>A   | A602A      | S            | 5                     | 5             | 0.1136    | 0.0453           | 1                            |
| 14   | Unknown    | 1921 T>C   | S641P      | NS           | 0                     | 1             | 0.0114    | 0                | 1                            |
| 15   | rs16918344 | 1997 C>T   | A666V      | NS           | 8                     | 5             | 0.1477    | 0.0907           | 0.5494                       |
| 16   | rs10508578 | 2177 G>A   | S726N      | NS           | 3                     | 2             | 0.0568    | 0.0389           | 1                            |
| 17   | rs4601653  | 2377 G>C   | D793H      | NS           | 10                    | 6             | 0.1818    | 0.0916           | 0.4077                       |
| 18   | rs2358355  | 2660 A>G   | N887S      | NS           | 8                     | 7             | 0.1705    | 0.1330           | 1                            |
| 18   | Unknown    | 2678 C>G   | T893R      | NS           | 1                     | 0             | 0.0114    | 0                | 1                            |
| 21   | Unknown    | 3277 G>A   | E1093K     | NS           | 1                     | 0             | 0.0114    | 0                | 1                            |

|    |            |          |            |      |    |    |        |        |        |
|----|------------|----------|------------|------|----|----|--------|--------|--------|
| 21 | rs72796460 | 3369 C>T | I1123I     | S    | 1  | 2  | 0.0341 | 0.0481 | 1      |
| 22 | Unknown    | 3534delG | F1179Sfs*4 | Del. | 0  | 1  | 0.0114 | 0      | 1      |
| 24 | rs7100382  | 3797 C>A | A1266D     | NS   | 15 | 20 | 0.3977 | 0.3942 | 0.3838 |
| 24 | rs7100403  | 3829 G>A | V1277I     | NS   | 15 | 21 | 0.4091 | 0.4643 | 0.2783 |
| 25 | rs76551926 | 3981 C>T | N1327N     | S    | 1  | 2  | 0.0341 | 0.0250 | 1      |
| 25 | rs1609746  | 4071 T>G | N1357K     | NS   | 15 | 21 | 0.4091 | 0.4661 | 0.2783 |
| 26 | rs10827306 | 4250 C>T | A1417V     | NS   | 16 | 21 | 0.4205 | 0.4501 | 0.3879 |
| 27 | rs12773592 | 4538 A>G | D1513G     | NS   | 9  | 9  | 0.2045 | 0.1190 | 1      |
| 27 | rs12271333 | 4546 G>A | E1516K     | NS   | 9  | 9  | 0.2045 | 0.1190 | 1      |
| 28 | rs78832888 | 4756 A>G | M1586V     | NS   | 4  | 4  | 0.0909 | 0.1035 | 1      |
| 28 | rs10763975 | 4804 A>G | I1602V     | NS   | 1  | 4  | 0.0568 | 0.1364 | 0.3604 |
| 30 | rs16918863 | 5047 C>A | L1683I     | NS   | 1  | 7  | 0.0909 | 0.1919 | 0.0580 |
| 30 | rs10827499 | 5127 C>T | D1709D     | S    | 8  | 11 | 0.2159 | 0.2550 | 0.3052 |
| 30 | rs35934077 | 5135 A>G | D1712G     | NS   | 0  | 1  | 0.0114 | 0.0055 | 1      |
| 31 | rs12256835 | 5163 T>G | H1721Q     | NS   | 0  | 11 | 0.1250 | 0.2816 | 0.0005 |
| 32 | rs7100661  | 5420 T>C | M1807T     | NS   | 0  | 3  | 0.0641 | 0.0916 | 0.2412 |
| 32 | rs41276112 | 5453 A>T | D1818V     | NS   | 0  | 3  | 0.0341 | 0.0192 | 0.2412 |
| 34 | rs10827628 | 5822 A>G | S1941N     | NS   | 21 | 23 | 0.5000 | 0.4766 | 0.8313 |
| 35 | rs7909976  | 6069 A>C | S2023S     | S    | 4  | 5  | 0.1023 | 0.1685 | 1      |

## Supplemental Reference

1. 1000 Genomes Project Consortium, G. R. Abecasis, A. Auton, L. D. Brooks, M. A. DePristo, R. M. Durbin, R. E. Handsaker, H. M. Kang, G. T. Marth, and G. A. McVean. 2012. An integrated map of genetic variation from 1,092 human genomes. *Nature*. **491**: 56–65.
